# Supplementary material
Source: Copernicus journal article supplement (doi:10.5194/egusphere-2026-1788)
Supplement: Supplementary file 1 [file egusphere-2026-1788-supplement.pdf]

## S1. Materials and reagents

- 5 Ultratrace H<sub>2</sub>O<sub>2</sub> (≥30%), no stabilizers added, (1R,2S,5R)-(-)-Menthol (≥99%), (+)-Borneol (≥98%), water for LC/MS (gradient-grade) were purchased from Sigma-Merck (Schnelldorf, Germany). (+)-Fenchol was purchased from Alfa Aesar; Chemat (Gdańsk, Poland). (+)-Fenchone (>98%), and (1S,2S,5S)-(-)-2-hydroxy-3-
- 10 pinanone were purchased from TCI. Camphor (>99.76%) and (±)Camphorquinone (>99.90%) were purchased from Ambeed. Menthone (≥97%), (±)-exo,exo-2,3-Camphanediol (≥97%), and Dimethyl phthalate (≥99%) were purchased from Sigma-Merck (Schnelldorf, Germany). Sodium chloride and extra pure were purchased from Thermo. Ethyl acetate (≥99.5%), was purchased from Honeywell (Avantor Performance Materials, Gliwice, Poland).
- Ultra-high purity (UHP) gases: helium (≥ 99.9999%) was supplied by Multax (Stare Babice, Poland), methane (≥ 99.9995%) was purchased from AirProducts (Warsaw, Poland), and ammonia (99.999%) was obtained from Air Liquid (Warsaw, Poland).

## S2. Kinetic box models

- Reactions 1-5 in Table S2-S4 describe the generation of OH via photolysis of H<sub>2</sub>O<sub>2</sub> (Tan et al., 2009). The k values of Reactions 1-5 in Tables S2-S4 reflect the first-order rate of disappearance of H<sub>2</sub>O<sub>2</sub>. This value was obtained by fitting the model data to the experimentally measured rate of H<sub>2</sub>O<sub>2</sub> photolysis, which was obtained by visual titration with potassium permanganate. The majority of k values used in the models were predicted with the structure-activity relationship (SAR) (Witkowski et al., 2024).

**Table S1.** Reactions used in the model for the aqueous OH oxidation of fenchol (R1).

| Reaction number | Reaction                                                                           | k (M <sup>-1</sup> s <sup>-1</sup> ) |
|-----------------|------------------------------------------------------------------------------------|--------------------------------------|
| 1               | H <sub>2</sub> O <sub>2</sub> = OH + OH                                            | 5.4×10 <sup>-6</sup>                 |
| 2               | OH + H <sub>2</sub> O <sub>2</sub> = HO <sub>2</sub> + H <sub>2</sub> O            | 2.7×10 <sup>7</sup>                  |
| 3               | HO <sub>2</sub> +H <sub>2</sub> O <sub>2</sub> =OH + H <sub>2</sub> O              | 3.7                                  |
| 4               | HO <sub>2</sub> + HO <sub>2</sub> = H <sub>2</sub> O <sub>2</sub> + O <sub>2</sub> | 8.3×10 <sup>5</sup>                  |
| 5               | OH + HO <sub>2</sub> = H <sub>2</sub> O+O <sub>2</sub>                             | 7.1×10 <sup>9</sup>                  |
| 6               | FCH + OH = Pr1                                                                     | 8.0×10 <sup>7</sup>                  |
| 7               | FCH + OH = Fenchone                                                                | 5.6×10 <sup>8</sup>                  |
| 8               | FCH + OH = P1                                                                      | 3.8×10 <sup>8</sup>                  |
| 9               | FCH + OH = P2                                                                      | 2.0×10 <sup>9</sup>                  |
| 10              | P1 + OH = Pr2                                                                      | 6.0×10 <sup>7</sup>                  |
| 11              | P1 + OH = P3                                                                       | 2.9×10 <sup>9</sup>                  |
| 12              | P3 + OH = Pr3                                                                      | 2.0×10 <sup>9</sup>                  |
| 13              | P2 + OH = Pr4                                                                      | 5.0×10 <sup>7</sup>                  |
| 14              | P2 + OH = P4                                                                       | 4.1×10 <sup>9</sup>                  |

|    |                     |                   |
|----|---------------------|-------------------|
| 15 | P4 + OH = Pr5       | $2.0 \times 10^8$ |
| 18 | P4 + OH = P6        | $1.2 \times 10^9$ |
| 19 | P4 + OH = P5        | $1.4 \times 10^9$ |
| 20 | P6 + OH = Pr6       | $6.0 \times 10^7$ |
| 21 | P6 + OH = P7        | $2.8 \times 10^9$ |
| 22 | P5 + OH = Pr7       | $1.8 \times 10^9$ |
| 23 | P7 + OH = Pr8       | $1.6 \times 10^9$ |
| 24 | Fenchone + OH = Pr9 | $1.9 \times 10^9$ |
| 25 | Fenchone + OH = P8  | $3.2 \times 10^8$ |
| 26 | Fenchone + OH = P10 | $2.1 \times 10^8$ |
| 27 | Fenchone + OH = P9  | $2.7 \times 10^8$ |
| 28 | P8 + OH = Pr10      | $1.5 \times 10^9$ |
| 29 | P10 + OH = Pr11     | $3.3 \times 10^9$ |
| 30 | P9 + OH = Pr12      | $3.0 \times 10^9$ |

20 **Table S2** Reactions used in the model for the aqueous OH oxidation of borneol (R2)

| Reaction number | Reaction              | k (M <sup>-1</sup> s <sup>-1</sup> ) |
|-----------------|-----------------------|--------------------------------------|
| 1               | H2O2 = OH + OH        | $5.3 \times 10^{-6}$                 |
| 2               | OH + H2O2 = HO2 + H2O | $2.7 \times 10^7$                    |
| 3               | HO2+H2O2=OH + H2O     | 3.7                                  |
| 4               | HO2 + HO2 = H2O2 + O2 | $8.3 \times 10^5$                    |
| 5               | OH + HO2 = H2O+O2     | $7.1 \times 10^9$                    |
| 6               | BNL+ OH = Pr1         | $9.0 \times 10^7$                    |
| 7               | BNL + OH = Camphor    | $6.6 \times 10^8$                    |
| 8               | BNL + OH = P1         | $5.3 \times 10^8$                    |
| 9               | BNL + OH = P2         | $4.9 \times 10^8$                    |
| 10              | BNL + OH = P6         | $1.2 \times 10^9$                    |
| 11              | BNL + OH = P7         | $3.3 \times 10^8$                    |
| 12              | BNL + OH = P12        | $6.0 \times 10^7$                    |
| 13              | P12 + OH = Pr2        | $2.6 \times 10^9$                    |
| 14              | P1 + OH = Pr3         | $2.6 \times 10^9$                    |
| 15              | P6 + OH = Pr4         | $2.4 \times 10^9$                    |
| 18              | P2 + OH = Pr5         | $8.0 \times 10^7$                    |
| 19              | P2 + OH = P3          | $3.6 \times 10^9$                    |
| 20              | P7 + OH = Pr6         | $1.0 \times 10^8$                    |
| 21              | P7 + OH = P8          | $3.2 \times 10^9$                    |

|    |                     |                   |
|----|---------------------|-------------------|
| 22 | P3 + OH = Pr7       | $9.0 \times 10^7$ |
| 23 | P3 + OH = P4        | $8.8 \times 10^8$ |
| 24 | P3 + OH = P5        | $7.9 \times 10^8$ |
| 25 | P4 + OH = Pr8       | $1.7 \times 10^9$ |
| 26 | P5 + OH = Pr9       | $1.4 \times 10^9$ |
| 27 | P8 + OH = Pr10      | $9.0 \times 10^7$ |
| 28 | P8 + OH = P9        | $7.5 \times 10^8$ |
| 29 | P8 + OH = P10       | $6.7 \times 10^8$ |
| 30 | P9 + OH = Pr11      | $1.7 \times 10^9$ |
| 31 | P10 + OH = Pr12     | $1.4 \times 10^9$ |
| 32 | Camphor + OH = Pr13 | $1.9 \times 10^9$ |
| 33 | Camphor + OH = CA   | $2.4 \times 10^8$ |
| 34 | Camphor + OH = P14  | $2.9 \times 10^8$ |
| 35 | CA + OH = Pr14      | $2.0 \times 10^9$ |
| 36 | P14 + OH = Pr15     | $2.0 \times 10^9$ |

**Table S3** Reactions used in the model for the aqueous OH oxidation of menthol (R3)

| Reaction number | Reaction              | k (M <sup>-1</sup> s <sup>-1</sup> ) |
|-----------------|-----------------------|--------------------------------------|
| 1               | H2O2 = OH + OH        | $4.0 \times 10^{-6}$                 |
| 2               | OH + H2O2 = HO2 + H2O | $2.7 \times 10^7$                    |
| 3               | HO2+H2O2=OH + H2O     | 3.7                                  |
| 4               | HO2 + HO2 = H2O2 + O2 | $8.3 \times 10^5$                    |
| 5               | OH + HO2 = H2O+O2     | $7.1 \times 10^9$                    |
| 6               | MTH + OH = Pr1        | $1.6 \times 10^8$                    |
| 7               | MTH + OH = Menthone   | $2.7 \times 10^8$                    |
| 8               | MTH + OH = P1         | $2.3 \times 10^9$                    |
| 9               | MTH + OH = P2         | $5.9 \times 10^8$                    |
| 10              | MTH + OH = P7         | $3.5 \times 10^8$                    |
| 11              | MTH + OH = P8         | $3.1 \times 10^8$                    |
| 12              | P1 + OH = Pr2         | $4.3 \times 10^9$                    |
| 13              | P2 + OH = Pr3         | $3.5 \times 10^8$                    |
| 14              | P2 + OH = P3          | $4.0 \times 10^9$                    |
| 15              | P3 + OH = Pr4         | $4.4 \times 10^8$                    |
| 18              | P3 + OH = P4          | $4.0 \times 10^9$                    |
| 19              | P4 + OH = Pr5         | $1.5 \times 10^8$                    |
| 20              | P4 + OH = P6          | $1.5 \times 10^9$                    |

|    |                      |                      |
|----|----------------------|----------------------|
| 21 | P4 + OH = P5         | $1.3 \times 10^9$    |
| 22 | P6 + OH = Pr6        | $2.8 \times 10^9$    |
| 23 | P5 + OH = Pr7        | $2.3 \times 10^9$    |
| 24 | P7+ OH = Pr8         | $4.1 \times 10^9$    |
| 25 | P8 + OH = Pr9        | $1.2 \times 10^8$    |
| 26 | P8 + OH = P9         | $5.6 \times 10^9$    |
| 27 | P9 + OH = Pr10       | $2.1 \times 10^8$    |
| 28 | P9 + OH = P10        | $4.0 \times 10^9$    |
| 29 | P10 + OH = Pr11      | $1.3 \times 10^8$    |
| 30 | P10 + OH = P12       | $1.3 \times 10^9$    |
| 31 | P10 + OH = P11       | $1.1 \times 10^9$    |
| 32 | P12 + OH = Pr12      | $2.7 \times 10^{10}$ |
| 33 | P11 + OH = Pr13      | $2.3 \times 10^{10}$ |
| 34 | Menthone + OH = Pr14 | $2.9 \times 10^9$    |
| 35 | Menthone + OH = P13  | $4.3 \times 10^8$    |
| 36 | Menthone + OH = P16  | $6.4 \times 10^8$    |
| 37 | Menthone + OH = P17  | $3.0 \times 10^8$    |
| 38 | P13 + OH = Pr15      | $3.3 \times 10^9$    |
| 39 | P16 + OH = Pr16      | $3.6 \times 10^9$    |
| 40 | P17 + OH = Pr17      | $3.2 \times 10^9$    |

**Table S4** Henry's Law constant values for the reactants of R1

| Name     | $M \times \text{atm}^{-1}$ | $H^{\text{cc}}$       |
|----------|----------------------------|-----------------------|
| Fenchol  | $21.0 \times 10^2$         | $5.14 \times 10^3$    |
| Fenchone | 14.3                       | $3.50 \times 10^2$    |
| P1       | $3.91 \times 10^5$         | $9.57 \times 10^6$    |
| P2       | $4.08 \times 10^3$         | $9.98 \times 10^4$    |
| P6       | $2.51 \times 10^3$         | $6.14 \times 10^4$    |
| P5       | $1.30 \times 10^8$         | $3.18 \times 10^9$    |
| P3       | $3.75 \times 10^4$         | $9.17 \times 10^5$    |
| P8       | $1.49 \times 10^6$         | $3.65 \times 10^7$    |
| P10      | $8.40 \times 10^{11}$      | $2.06 \times 10^{13}$ |
| P9       | $3.08 \times 10^{10}$      | $7.54 \times 10^{11}$ |
| P4       | $3.91 \times 10^5$         | $9.57 \times 10^6$    |
| P7       | $1.25 \times 10^7$         | $3.06 \times 10^8$    |

**Table S5** Henry's Law constant values for the reactants of R2

| Name    | $M \times \text{atm}^{-1}$ | $H^{cc}$           |
|---------|----------------------------|--------------------|
| Borneol | 46.0                       | $1.13 \times 10^3$ |
| Camphor | 14.3                       | $3.50 \times 10^2$ |
| P1      | $3.91 \times 10^5$         | $9.57 \times 10^6$ |
| P3      | $3.75 \times 10^4$         | $9.17 \times 10^5$ |
| P2      | $4.08 \times 10^3$         | $9.98 \times 10^4$ |
| P4      | $2.40 \times 10^5$         | $5.87 \times 10^6$ |
| P5      | $1.25 \times 10^7$         | $3.06 \times 10^8$ |
| P6      | $3.91 \times 10^5$         | $9.57 \times 10^6$ |
| P8      | $3.75 \times 10^4$         | $9.17 \times 10^5$ |
| P7      | $4.08 \times 10^3$         | $9.98 \times 10^4$ |
| P9      | $2.40 \times 10^5$         | $5.87 \times 10^6$ |
| P10     | $1.25 \times 10^7$         | $3.06 \times 10^8$ |
| P12     | $2.66 \times 10^7$         | $6.51 \times 10^8$ |
| P14     | $2.55 \times 10^6$         | $6.24 \times 10^7$ |
| CA      | $7.63 \times 10^7$         | $1.87 \times 10^9$ |

25

**Table S6.** Henry's Law constant values for the reactants of R3.

| Name     | $M \times \text{atm}^{-1}$ | $H^{cc}$           |
|----------|----------------------------|--------------------|
| Menthol  | 66.9                       | $1.64 \times 10^3$ |
| Menthone | 6.29                       | $1.54 \times 10^2$ |
| P1       | $1.72 \times 10^5$         | $4.21 \times 10^6$ |
| P2       | $1.80 \times 10^3$         | $4.40 \times 10^4$ |
| P3       | $1.72 \times 10^5$         | $4.21 \times 10^6$ |
| P4       | $1.65 \times 10^4$         | $4.04 \times 10^5$ |
| P6       | $1.06 \times 10^5$         | $2.59 \times 10^6$ |
| P5       | $5.49 \times 10^6$         | $1.34 \times 10^8$ |
| P7       | $1.72 \times 10^5$         | $4.21 \times 10^6$ |
| P8       | $1.80 \times 10^3$         | $4.40 \times 10^4$ |
| P9       | $1.72 \times 10^5$         | $4.21 \times 10^6$ |
| P10      | $1.65 \times 10^4$         | $4.04 \times 10^5$ |
| P12      | $1.06 \times 10^5$         | $2.59 \times 10^6$ |
| P11      | $5.49 \times 10^6$         | $1.34 \times 10^8$ |
| P16      | $1.13 \times 10^6$         | $2.76 \times 10^7$ |
| P17      | $4.95 \times 10^5$         | $1.21 \times 10^7$ |
| P13      | $3.38 \times 10^7$         | $8.27 \times 10^8$ |

28 **Table S7.** The modeled and measured yields of the products from the reactions R1 - R3.

| Molar yield <sup>a</sup>                      |            |                                               |            |                                               |            |
|-----------------------------------------------|------------|-----------------------------------------------|------------|-----------------------------------------------|------------|
| <i>Products formed directly from FCH (R1)</i> |            | <i>Products formed directly from BNL (R2)</i> |            | <i>Products formed directly from MTH (R3)</i> |            |
| Fenchone                                      | 0.11±0.01  | Camphor                                       | 0.12±0.02  | Menthone                                      | 0.03±0.003 |
| P1                                            | 0.05±0.003 | P1                                            | 0.10±0.01  | P1                                            | 0.17±0.01  |
| P2                                            | 0.22±0.01  | P2 <sup>b</sup>                               | 0.15       | P2                                            | 0.02±0.003 |
| P3                                            | 0.07±0.01  | P3                                            | 0.10±0.003 | P3                                            | 0.16±0.004 |
| P4                                            | 0.12±0.01  | P4 <sup>b</sup>                               | 0.03±0.02  | P4                                            | 0.04±0.01  |
| P5                                            | 0.16±0.001 | P5                                            | 0.02±0.01  | P5                                            | 0.04±0.001 |
| P6                                            | 0.16±0.01  | P6                                            | 0.15±0.01  | P6                                            | 0.04±0.001 |
| P7                                            | 0.02±0.01  | P7 <sup>b</sup>                               | 0.10       | P7                                            | 0.19±0.01  |
|                                               |            | P8                                            | 0.16±0.02  | P8 <sup>b</sup>                               | 0.08       |
|                                               |            | P9 <sup>b</sup>                               | 0.005      | P9 <sup>b</sup>                               | 0.08       |
|                                               |            | P10 <sup>b</sup>                              | 0.0045     | P10                                           | 0.02±0.01  |
|                                               |            | P12 <sup>b</sup>                              | 0.02       | P11 <sup>b</sup>                              | 0.0002     |
|                                               |            |                                               |            | P12 <sup>b</sup>                              | 0.0002     |

29 <sup>a</sup>Uncertainties are 2σ values from triplicate measurements <sup>b</sup>Values derived by fitting the model to the  
 30 experimental data

31  
 32 **Table S8.** The modeled yields of terpenoic acids (second-generation products) formed from fenchone, camphor,  
 33 and menthone.

| <i>Products formed from fenchone</i> |                             |                       | <i>Products formed from camphor</i> |                             |                      | <i>Products formed from menthone</i> |                             |                       |
|--------------------------------------|-----------------------------|-----------------------|-------------------------------------|-----------------------------|----------------------|--------------------------------------|-----------------------------|-----------------------|
| Name                                 | Yield (effective, from FCH) | Yield (from fenchone) | Name                                | Yield (effective, from BNL) | Yield (from camphor) | Name                                 | Yield (effective, from MTH) | Yield (from menthone) |
| P8 <sup>b</sup>                      | 0.01                        | 0.12                  | P13 <sup>b</sup>                    | 0.01                        | 0.1                  | P13 <sup>b</sup>                     | 0.003                       | 0.1                   |
| P9 <sup>b</sup>                      | 0.01                        | 0.1                   | P15 <sup>b</sup>                    | 0.01                        | 0.12                 | P16 <sup>b</sup>                     | 0.004                       | 0.15                  |
| P10 <sup>b</sup>                     | 0.01                        | 0.08                  |                                     |                             |                      | P17 <sup>b</sup>                     | 0.002                       | 0.07                  |

34 <sup>a</sup>Uncertainties are 2σ values from triplicate measurements <sup>b</sup>Values derived by fitting the model to the  
 35 experimental data

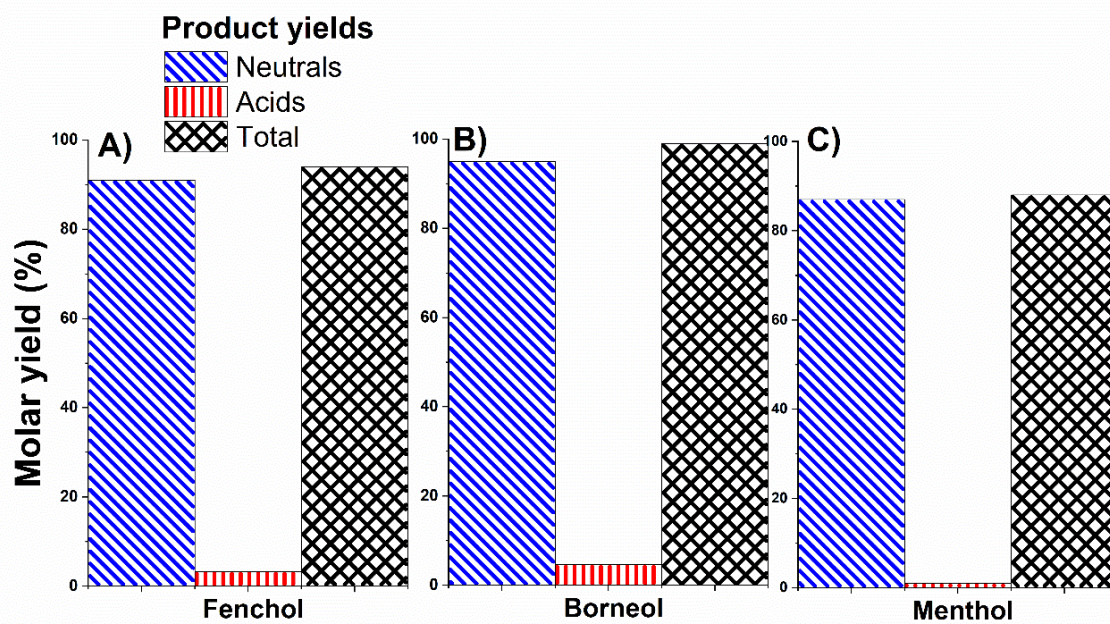

36

37

Figure S1. Yields of neutral and acidic products formed in reactions R1 – 3 in Fig. 1.

### S3 Chromatographic analyses

GC/MS analyses were conducted using a GC/MS-2010 Ultra gas chromatograph coupled with a single quadrupole mass spectrometer (Shimadzu) equipped with electron ionization (EI) or negative chemical ionization (NCI) ion sources – see section 2.7.1 in the main text.

#### S3.1 Gas chromatography coupled with electron-ionization mass spectrometry

**Table S9.** Retention times for and ions monitored in SIM mode for the reactants of R1 studied with the GC-EI/MS instrument.

| Name                                | Elemental composition                          | Retention time (min) | Column      | Ions monitored in selected SIM mode (m/z)                                                                                                        | Concentration range (µg/L)    | R <sup>2,a</sup> |
|-------------------------------------|------------------------------------------------|----------------------|-------------|--------------------------------------------------------------------------------------------------------------------------------------------------|-------------------------------|------------------|
| (+)-Fenchol                         | C <sub>10</sub> H <sub>18</sub> O              | 18.16                | VF-WAX plus | 154, 139, 136, 125, 123, 121, 111, 107, 105, 97, 91, 85, 84, 81, 80, 72, 71, 69, 67, 57, 55, 53                                                  | (3.78-4.31) × 10 <sup>4</sup> | 0.984            |
| (+)-Fenchone                        | C <sub>10</sub> H <sub>16</sub> O              | 17.45                |             | 153, 152, 137, 134, 123, 119, 109, 97, 95, 91, 82, 81, 80                                                                                        |                               | 0.987            |
| (±)-exo,exo-2,3-Camphanediol        | C <sub>10</sub> H <sub>18</sub> O <sub>2</sub> | 20.84                |             | 152, 139, 137, 122, 121, 119, 112, 111, 110, 109, 107, 99, 96, 95, 94, 85, 84, 83, 82, 81                                                        |                               | 0.989            |
| (±)Camphorquinone                   | C <sub>10</sub> H <sub>14</sub> O <sub>2</sub> | 19.36                |             | 167, 166, 139, 138, 124, 123, 111, 110, 109, 105, 96, 95, 91, 84, 83                                                                             |                               | 0.997            |
| (1S,2S,5S)-(-)-2-hydroxy-3-pinanone | C <sub>10</sub> H <sub>16</sub> O <sub>2</sub> | 18.49                |             | 168, 140, 126, 125, 122, 119, 111, 108, 107, 100, 99, 97, 93, 92, 91, 85, 84, 83                                                                 |                               | 0.9974           |
| Product 1                           | -                                              | 18.65                |             | 167, 164, 150, 149, 139, 137, 135, 127, 126, 125, 124, 123, 121, 111, 110, 109, 108, 107, 98, 97, 95, 94, 93, 91, 85, 84, 83, 82, 81, 80, 79, 77 |                               | HP               |
| Product 2                           | -                                              | 18.74                |             | 139, 138, 123, 110, 109, 105, 97, 96, 95, 94, 91, 82, 81, 80, 79, 77, 70, 6                                                                      |                               | HP               |

|            |   |       |  |                                                                                                                  |     |
|------------|---|-------|--|------------------------------------------------------------------------------------------------------------------|-----|
|            |   |       |  | 9                                                                                                                |     |
| Product 3  | - | 19.12 |  | 168,153,150,135,126,125,123,<br>122,113,112,111,109,108,107,<br>100,97,96,95,94,93,91,85,84,8<br>3,82,81,80,79   | CQ  |
| Product 4  | - | 19.22 |  | 139,136,125,123,122,121,111,<br>108,107,105,100,99,98,97,96,9<br>5,94,93,92,91,85,84,83,82,81,8<br>0,79,77       | CQ  |
| Product 5  | - | 19.30 |  | 139,136,125,123,122,121,111,<br>108,107,105,100,99,98,97,96,9<br>5,94,93,92,91,85,84,83,82,81,8<br>0,79,77       | CQ  |
| Product 6  | - | 19.38 |  | 154,137,136,125,124,123,121,<br>112,111,110,109,108,107,98,9<br>7,96,95,94,93,91,85,84,83,82,8<br>1,80,79        | CQ  |
| Product 7  | - | 19.54 |  | 139,138,124,123,121,109,108,<br>107,105,97,96,95,94,93,92,91,<br>83,82,81,79,77                                  | CQ  |
| Product 8  | - | 19.73 |  | 153,151,150,136,135,125,122,<br>121,111,110,109,108,107,98,9<br>7,96,95,94,93,91,84,83,82,81,8<br>0,79           | CQ  |
| Product 9  | - | 19.93 |  | 154,139,136,123,122,121,112,<br>111,110,109,108,107,106,105,<br>99,97,96,95,94,93,92,91,85,84,<br>83,82,81,80,79 | CQ  |
| Product 10 | - | 20.54 |  | 154,153,139,129,127,123,121,<br>113,112,111,110,105,99,98,97,<br>95,94,91,85,83,82,81,80,79,77                   | CND |
| Product 11 | - | 20.66 |  | 226,139,137,129,128,123,121,<br>111,110,109,108,107,106,105,                                                     | CND |

|                    |    |       |  |                                                                                             |     |
|--------------------|----|-------|--|---------------------------------------------------------------------------------------------|-----|
|                    |    |       |  | 100,99,98,97,96,95,93,86,85,84,83,82,81,79                                                  |     |
| Product 12         | -  | 20.81 |  | 184,166,155,138,137,124,123,115,114,113,110,109,100,99,97,96,95,85,83,82,81,80,79           | CND |
| Product 13         | -  | 20.91 |  | 154,137,136,124,123,122,121,119,113,110,108,107,106,105,98,97,96,95,94,93,84,83,82,81,80,79 | CND |
| Product 14         | -  | 21.40 |  | 183,182,167,166,154,140,139,126,125,123,121,112,111,97,95,85,84,83,77                       | CND |
| Dimethyl phthalate | IS | 17.75 |  | 162,163, 134, 133, 120, 105, 104, 92, 77, 76, 50, 49                                        | -   |

45 <sup>a</sup>Surrogate standards used for quantification: HP = 2-hydroxy-3-pinane, CQ = Camphorquinone, CND= Camphanediol

**Table S10.** Retention times for precursor menthol, and its products were monitored in SIM mode with the GC-EI/MS instrument.

| Name                              | Elemental composition                          | Retention time (min) | Column      | Ions monitored in selected SIM mode (m/z)                                   | Concentration range (µg/L)    | R <sup>2,a</sup> |
|-----------------------------------|------------------------------------------------|----------------------|-------------|-----------------------------------------------------------------------------|-------------------------------|------------------|
| (-)-Menthol                       | C <sub>10</sub> H <sub>20</sub> O              | 12.53                | VF-WAX plus | 139, 138, 123, 110, 109, 96, 95, 83, 82, 81, 80, 71, 69, 68, 67, 57, 56, 55 | (3.38-3.64) × 10 <sup>4</sup> | 0.9952           |
| Menthone                          | C <sub>10</sub> H <sub>18</sub> O              | 11.07                |             | 155,154,140,139,125,121,113,112,111,110,109,98,97,96,95,94,93               |                               | 0.9951           |
| (±)-exo,exo-2,3-Camphanediol      | C <sub>10</sub> H <sub>18</sub> O <sub>2</sub> | 20.84                |             | 152,139,137,122,121,119,112,111,110,109,107,99,96,95,94,85,84,83,82,81      |                               | 0.9784           |
| (1S,2S,5S)-(-)-2-hydroxy-3-pinane | C <sub>10</sub> H <sub>16</sub> O <sub>2</sub> | 18.49                |             | 168,140,126,125,122,119,111,108,107,100,99,97,93,92,91,85,84,83             |                               | 0.9974           |
| Product 1                         | -                                              | 19.04                |             | 170,152,140,137,126,125,12                                                  |                               | HP               |

|                       |    |       |  |                                                                                                                                |     |
|-----------------------|----|-------|--|--------------------------------------------------------------------------------------------------------------------------------|-----|
|                       |    |       |  | 4,123,110,109,98,97,96,95,9<br>1,86,85,84,83,82,81,79                                                                          |     |
| Product 2             | -  | 19.40 |  | 169,168,167,153,139,138,13<br>7,127,126,125,124,123,113,1<br>12,111,110,109,107,99,98,97<br>,96,95,93,85,84,83,82,81,80,<br>79 | HP  |
| Product 3             | -  | 19.96 |  | 172,154,141,140,139,136,12<br>9,125,122,121,112,111,107,9<br>9,98,97,96,95,93,87,85,84,81<br>,71,70,69                         | HP  |
| Product 4             | -  | 20.84 |  | 152,142,139,137,126,124,12<br>3,122,121,119,113,112,111,1<br>10,109,107,99,97,96,95,94,8<br>5,84,83,82,81                      | CND |
| Dimethyl<br>phthalate | IS | 17.75 |  | 162,163,134,133, 120, 105,<br>104, 92, 77, 76, 50, 49                                                                          | -   |

\*Surrogate standards used for quantification: HP = 2-hydroxy-3-pinane, CND= Camphanediol

50 **Table S11.** Retention times for Borneol, and its products were monitored in SIM mode with the GC-EI/MS instrument.

| Name                             | Elemental composition                          | Retention time (min) | Column | Ions monitored in selected SIM mode (m/z)                                                     | Concentration range (µg/L)       | R <sup>2,a</sup> |
|----------------------------------|------------------------------------------------|----------------------|--------|-----------------------------------------------------------------------------------------------|----------------------------------|------------------|
| (+)-Borneol                      | C <sub>10</sub> H <sub>18</sub> O              | 13.16                |        | 140, 139, 136, 121, 111,<br>110, 96, 95, 83, 81, 82,<br>83, 79, 77, 71, 69, 67, 57,<br>55, 53 | (3.51-3.74) ×<br>10 <sup>4</sup> | 0.9964           |
| Camphor                          | C <sub>10</sub> H <sub>16</sub> O              | 11.70                |        | 153,152,147,137,123,119,<br>110,109,108,107,105,97,9<br>6,95,93,91                            |                                  | 0.9961           |
| (±)-exo,exo-2,3-<br>Camphanediol | C <sub>10</sub> H <sub>18</sub> O <sub>2</sub> | 20.84                |        | 152,139,137,122,121,119,<br>112,111,110,109,107,99,9<br>6,95,94,85,84,83,82,81                |                                  | 0.9899           |
| (±)Camphorquino                  | C <sub>10</sub> H <sub>14</sub> O <sub>2</sub> | 19.36                |        | 167,166,139,138,124,123,                                                                      |                                  | 0.9982           |

|                                     |                                                |       |                                                                       |                                                                                                                            |             |
|-------------------------------------|------------------------------------------------|-------|-----------------------------------------------------------------------|----------------------------------------------------------------------------------------------------------------------------|-------------|
| ne                                  |                                                |       | VF-WAX<br>plus                                                        | 111,110,109,105,96,95,91,<br>,84,83                                                                                        |             |
| (1S,2S,5S)-(-)-2-hydroxy-3-pinanone | C <sub>10</sub> H <sub>16</sub> O <sub>2</sub> | 18.49 |                                                                       | 168,140,126,125,122,119,<br>111,108,107,100,99,97,93,<br>,92,91,85,84,83                                                   | 0.9974      |
| Product 1                           | -                                              | 16.17 |                                                                       | 153,152,147,137,123,119,<br>110,109,108,95,93,83,82,<br>81,80                                                              | Camph<br>or |
| Product 2                           | -                                              | 16.59 |                                                                       | 139,136,121,111,110,105,<br>99,95,93,83,82,81                                                                              | Camph<br>or |
| Product 3                           | -                                              | 18.75 |                                                                       | 167,166,151,138,125,123,<br>110,109,107,106,95,93,83,<br>,81,77,70,69                                                      | HP          |
| Product 4                           | -                                              | 19.02 |                                                                       | 139,138,125,123,113,110,<br>109,96,95,91,84,82,81,80,<br>79                                                                | HP          |
| Product 5                           | -                                              | 19.22 |                                                                       | 139,138,124,123,110,109,<br>105,97,96,95,94,93,91,82,<br>81,80,79,77                                                       | HP          |
| Product 6                           | -                                              | 19.48 |                                                                       | 167,166,153,151,140,139,<br>138,135,126,125,124,123,<br>121,111,110,109,107,98,9<br>7,96,95,93,91,86,85,84,83<br>,82,81,79 | CQ          |
| Product 7                           | -                                              | 19.76 |                                                                       | 153,150,149,137,136,125,<br>121,112,111,110,109,107,<br>97,96,95                                                           | CQ          |
| Product 8                           | -                                              | 19.87 |                                                                       | 139,138,123,121,109,105,<br>96,95,94,93,91,83,81,79,7<br>7                                                                 | CQ          |
| Product 9                           | -                                              | 20.10 | 168,154,153,150,137,135,<br>125,124,123,110,109,108,<br>107,106,95,93 | CND                                                                                                                        |             |

|                       |    |       |  |                                                                                                                       |  |     |
|-----------------------|----|-------|--|-----------------------------------------------------------------------------------------------------------------------|--|-----|
| Product 10            | -  | 20.27 |  | 155,154,150,144,140,139,<br>137,136,126,125,123,122,<br>121,119,113,112,111,110,<br>109,108,107,106,105,103,<br>96,95 |  | CND |
| Product 11            | -  | 21.05 |  | 169,168,153,150,139,135,<br>125,124,123,111,110,109,<br>108,107                                                       |  | CND |
| Dimethyl<br>phthalate | IS | 17.75 |  | 162,163, 134, 133, 120,<br>105, 104, 92, 77, 76, 50,<br>49                                                            |  | -   |

<sup>a</sup>Surrogate standards used for quantification: HP = 2-hydroxy-3-pinanone, CQ = Camphorquinone, CND= Camphanediol

### S3.2 Gas chromatography coupled with negative chemical ionization mass spectrometry

**Table S12** Retention times with the elemental composition for TACs formed in FCH+OH reaction (R1) obtained using the LC-ToF/MS instrument

| <b>t<sub>r</sub></b><br><b>(min)</b> | <b>Name</b> | <b>m/z</b><br><b>(Da)</b> | <b>Elemental</b><br><b>composition</b>         | <b>Difference</b><br><b>(Da)</b> |
|--------------------------------------|-------------|---------------------------|------------------------------------------------|----------------------------------|
| 9.93                                 | P10         | 215.0920                  | C <sub>10</sub> H <sub>16</sub> O <sub>5</sub> | 0.0001                           |
| 12.10                                | P8          | 169.0868                  | C <sub>9</sub> H <sub>14</sub> O <sub>3</sub>  | 0.0003                           |
| 13.15                                | P9          | 199.0971                  | C <sub>10</sub> H <sub>16</sub> O <sub>4</sub> | 0.0001                           |

55

**Table S13** Retention times with their elemental composition for TACs formed from BNL + <sub>aq</sub>OH (R2) with the LC-ToF/MS instrument

| <b>t<sub>r</sub></b><br><b>(min)</b> | <b>Name</b>    | <b>m/z</b><br><b>(Da)</b> | <b>Elemental</b><br><b>composition</b>         | <b>Difference</b><br><b>(Da)</b> |
|--------------------------------------|----------------|---------------------------|------------------------------------------------|----------------------------------|
| 12.38                                | Camphoric acid | 199.0970                  | C <sub>10</sub> H <sub>16</sub> O <sub>4</sub> | 0.0000                           |
| 13.15                                | P15            | 181.0864                  | C <sub>10</sub> H <sub>14</sub> O <sub>3</sub> | -0.0001                          |
| 13.96                                | P12            | 183.1022                  | C <sub>10</sub> H <sub>16</sub> O <sub>3</sub> | 0.0001                           |

**Table S14** Retention times with the elemental composition for TACs formed from MTH + <sub>aq</sub>OH reaction (R3) obtained with the LC-ToF/MS instrument

60

| <b>t<sub>r</sub></b><br><b>(min)</b> | <b>Name</b> | <b>m/z</b><br><b>(Da)</b> | <b>Elemental</b><br><b>composition</b>         | <b>Difference</b><br><b>(Da)</b> |
|--------------------------------------|-------------|---------------------------|------------------------------------------------|----------------------------------|
| 15.27                                | P13         | 201.1130                  | C <sub>10</sub> H <sub>18</sub> O <sub>4</sub> | 0.0003                           |
| 16.17                                | P17         | 185.1184                  | C <sub>10</sub> H <sub>18</sub> O <sub>3</sub> | 0.0006                           |
| 16.33                                | P16         | 183.1024                  | C <sub>10</sub> H <sub>16</sub> O <sub>3</sub> | 0.0003                           |

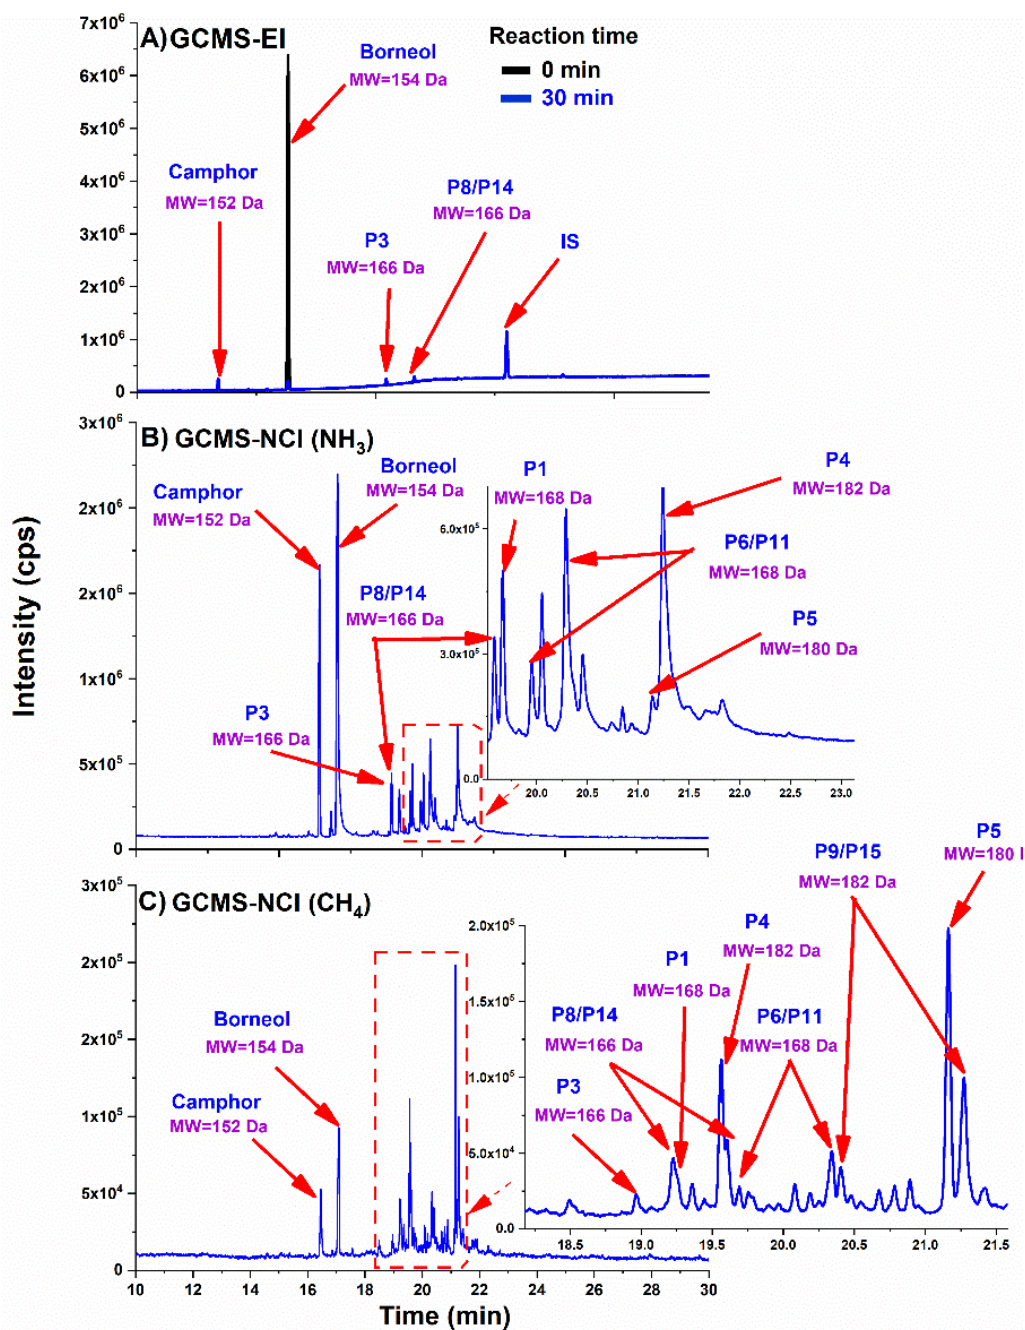

65 **Figure S2:** GC/MS chromatograms of the neutral products of borneol + OH reaction (R2) detected with EI (A) and (-)NCI using NH<sub>3</sub> (B), and CH<sub>4</sub> (C) as reagent gases. Note that different chromatographic columns were used for GC-EI/MS and GC-NCI/MS analyses (section 2.7.1), resulting in different retention times between panels (A), (B), and (C).

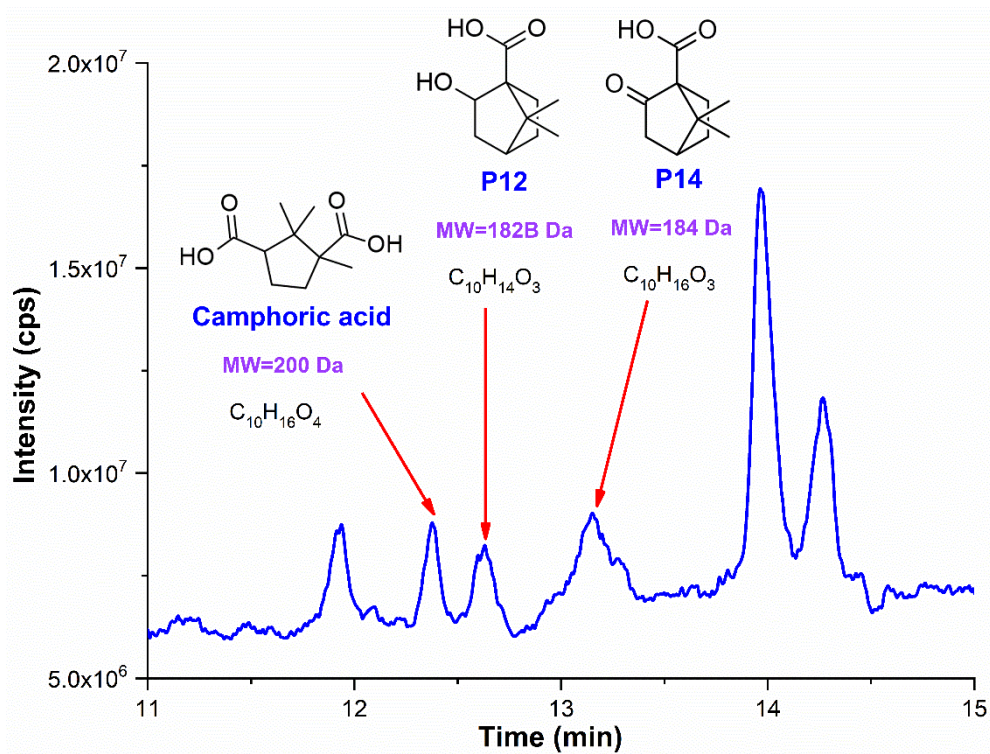

Figure S3: LC-ToF/MS chromatogram of TACs formed from OH reaction with borneol – R2 in the main text.

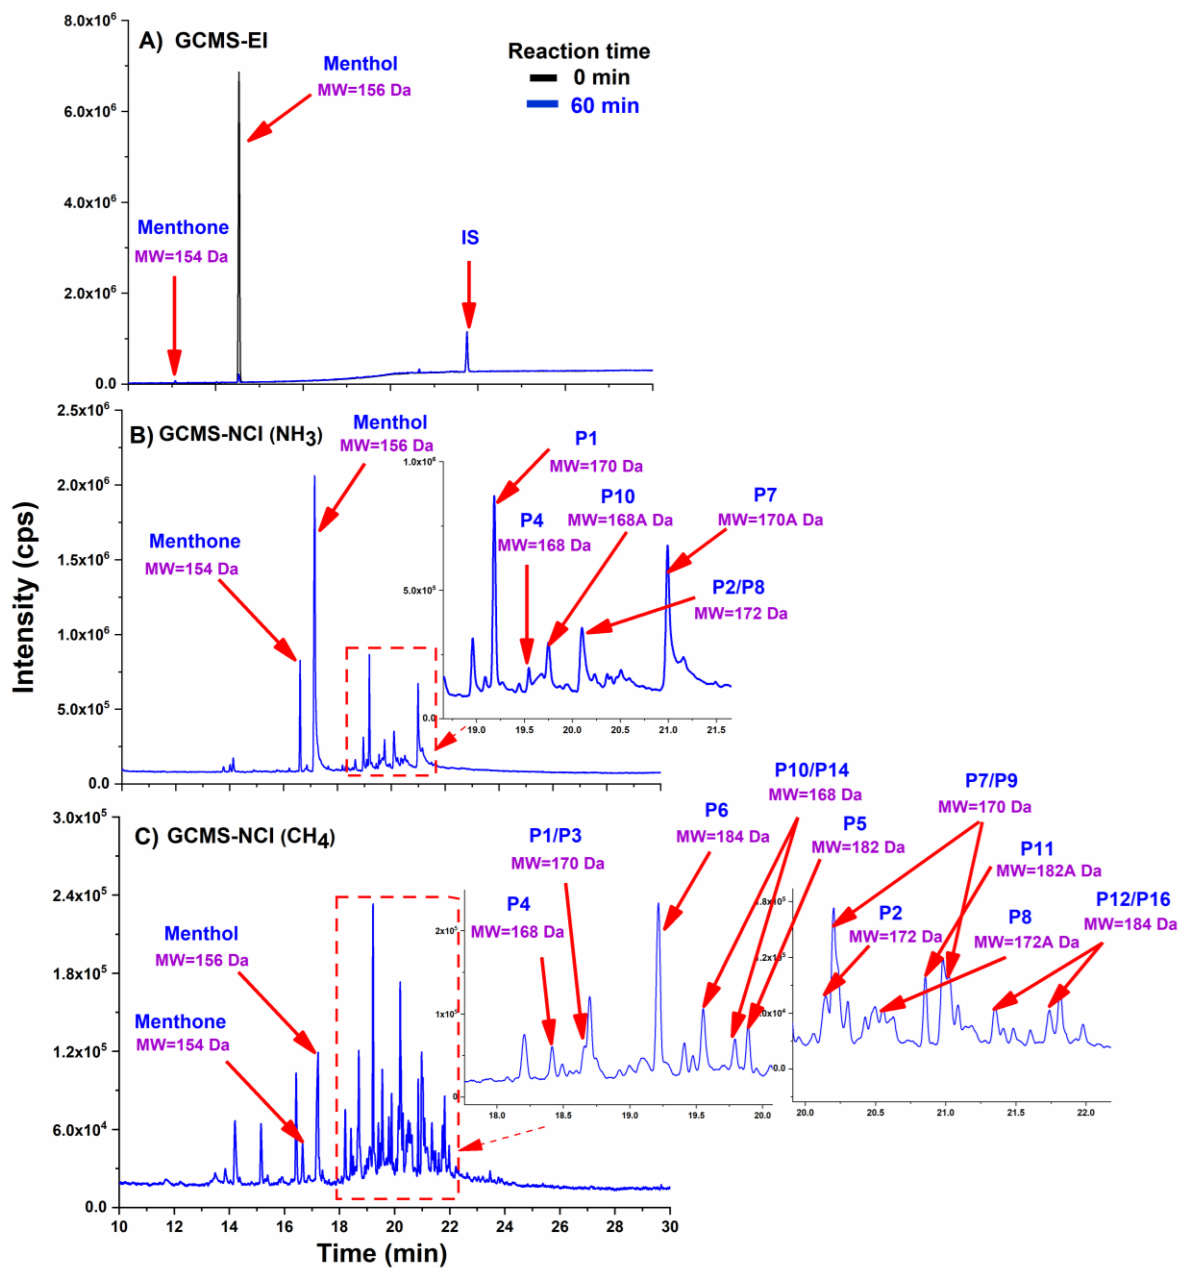

70 **Figure S4: GC/MS chromatograms of the neutral products of menthol + OH reaction (R3) detected with EI (A) and, (-)NCI using NH<sub>3</sub> (B), and CH<sub>4</sub> (C) as reagent gases. Note that different chromatographic columns were used for GC-EI/MS and GC-NCI/MS analyses (section 2.7.1), resulting in different retention times between panel (A) and panels (B) and (C).**

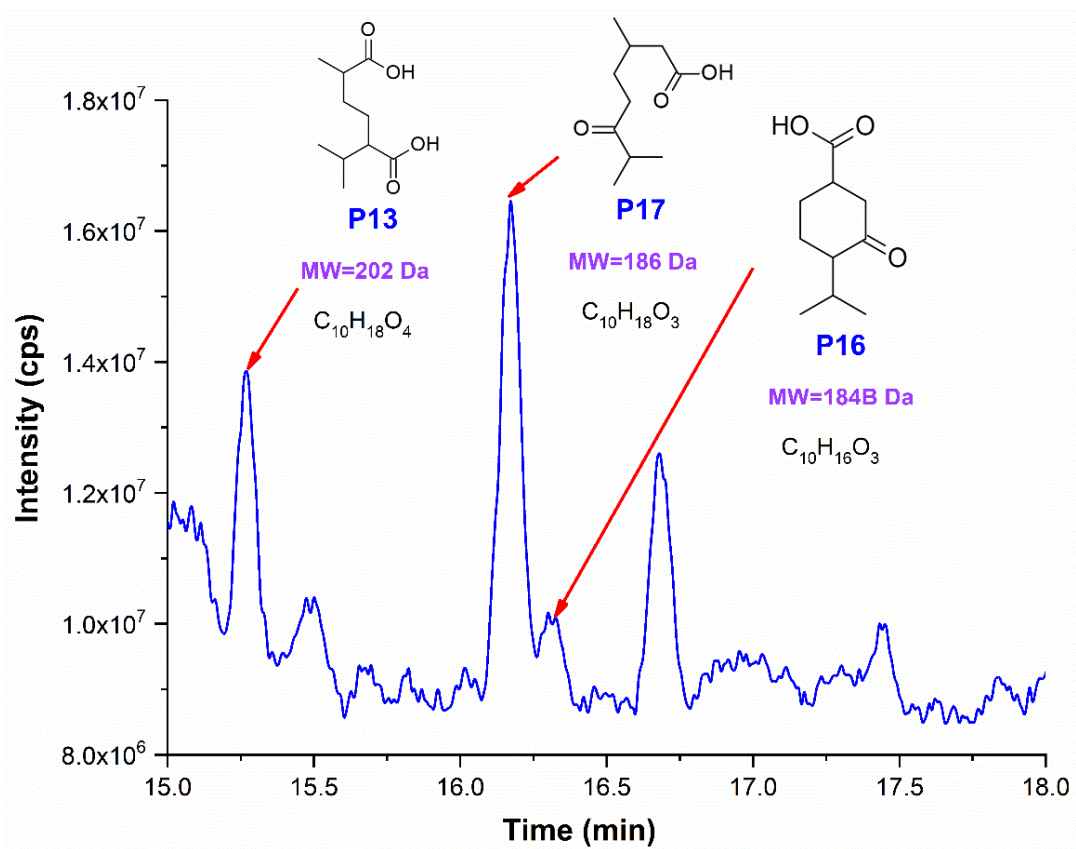

Figure S5: LC-ToF/MS chromatogram of TACs formed from OH reaction with menthol – R3 in Fig. 1.

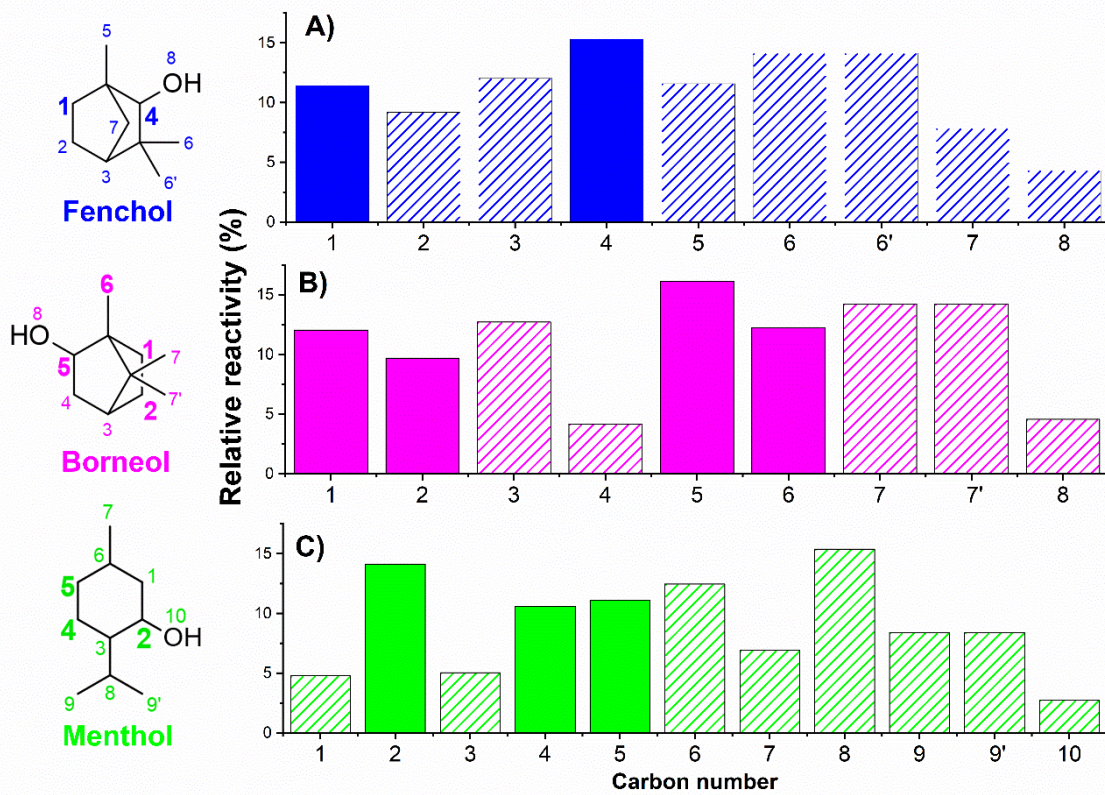

80 **Figure S6: The partial rate coefficients for the aliphatic H-atom abstraction from fenchol (A), borneol (B), and menthol (C) predicted with SAR. The H-atom abstraction sites shown in Schemes 1-7, in the main text, are shown in bold.**

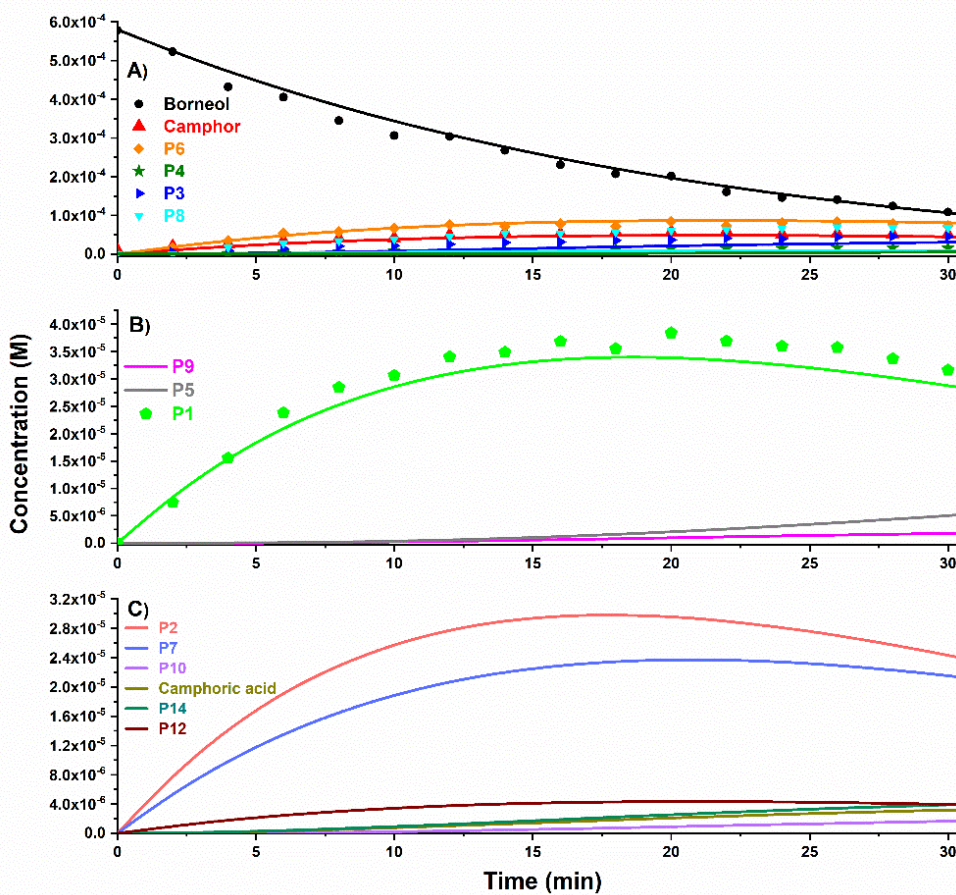

85 **Figure S7: Temporal concentration profiles of the BNL and products of R2: points - experiment, and lines - model; A) precursor (BNL), camphor, structures of products P3, P4, P6 and P8 (stable carbonyl products), B) structures of products P1, P5 and P9 (stable carbonyl products), C) structures of stable carbonyl products P2, P7, P10, TAC products are camphoric acid, P12, P14 are shown in Schemes 3-5 (main text).**

For R2, the temporal profiles of some of the products were also reproduced accurately by the box model - Fig. S7. For products camphor, P1, P3, P4, P6, P8, experimental agrees well with the results generated by the model- Fig. S7A, B. However, for products P2, P5, P7, P9, P10, P12, P14, camphoric acid, only the model-generated data is presented in Figs. S7B, C (section 3.5). For R2, the yield of acidic products was approx. 5%, and the yield of 95±10% corresponded to the 90 carbonyl products – Table 1 and Figure S1.

Similar results were obtained for R3 – Fig. S8.

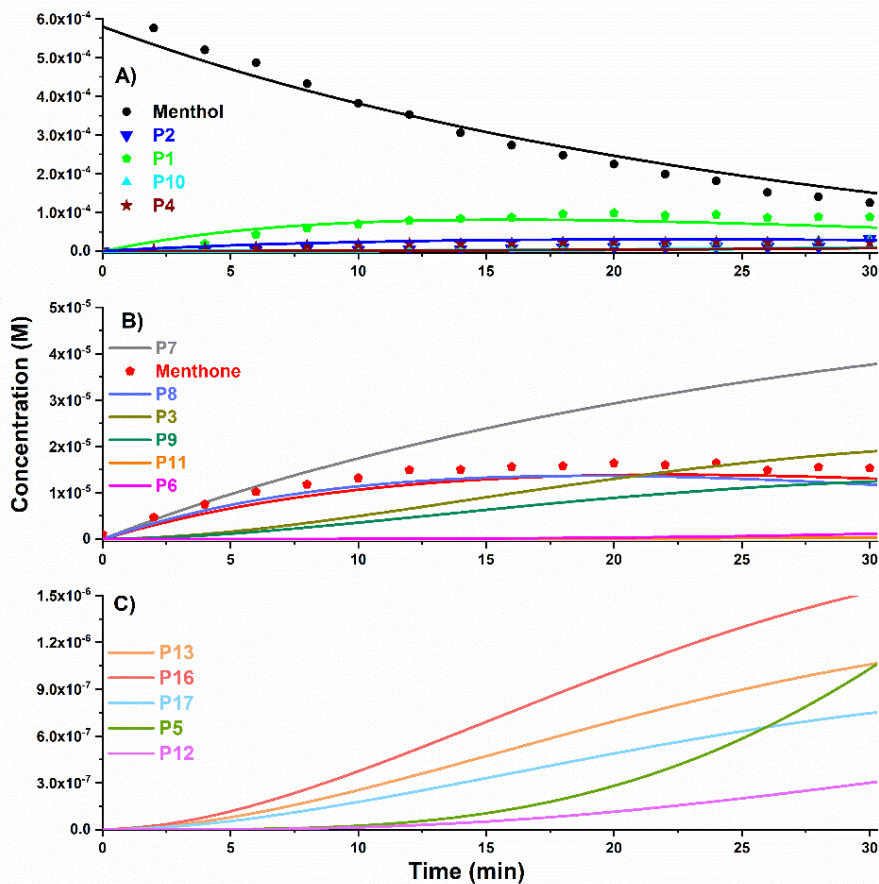

95 **Figure S8: Temporal concentration profiles of the MTH and products of R3: points - experiment, and lines - model; A) precursor (MTH), P1, P2, P4, P10; B) structures of products menthone, P3, P6, P7, P8, P9, P11 (stable carbonyl products), C) structures of stable carbonyl products P5, P12, TAC products are P13, P16, P17 are shown in Schemes 6 and 7.**

The box model for R3 accurately reproduced the temporal evolution of products menthone, P1, P2, P4, and P10 - Fig. S8A, B. For products P3, P5-P9, P11-P13, P16, and P17, only data generated by the model is presented- Figs. S8B and C (section 3.5). For R3, the yields of acidic and stable carbonyl products were 1% and ( $87 \pm 5\%$ ), respectively- Table 1 and Fig. S1.

## 100 References

- Tan, Y., Perri, M. J., Seitzinger, S. P., and Turpin, B. J.: Effects of Precursor Concentration and Acidic Sulfate in Aqueous Glyoxal-OH Radical Oxidation and Implications for Secondary Organic Aerosol, *Environmental Science & Technology*, 43, 8105-8112, 10.1021/es901742f, 2009.
- Witkowski, B., Jain, P., Wileńska, B., and Gierczak, T.: Temperature-dependent aqueous OH kinetics of  $C_2$ - $C_{10}$  linear and terpenoid alcohols and diols: new rate coefficients, structure-activity relationship, and atmospheric lifetimes, *Atmos. Chem. Phys.*, 24, 663-688, 10.5194/acp-24-663-2024, 2024.
- 105
